# Supplementary material for: Survival Impact of an Enhanced Multidisciplinary Thoracic Oncology Conference in a Regional Community Health Care System
Source: PubMed Central journal article supplement — JTO Clin Res Rep. 2021 Jul 3;2(8):100203. doi: 10.1016/j.jtocrr.2021.100203 (PMC8474211; doi:10.1016/j.jtocrr.2021.100203), 2021-07-03
Supplement: mmc2.pdf [file mmc2.pdf]

# Kaplan Meier Survival Curves among Early Stage: I/II/IIIA(T3/N1)

Log-Rank p-value: 0.0007

Strata Cohort=eMTOC Cohort=Non-MTOC: Metropolitan Cohort=Non-MTOC: Regional

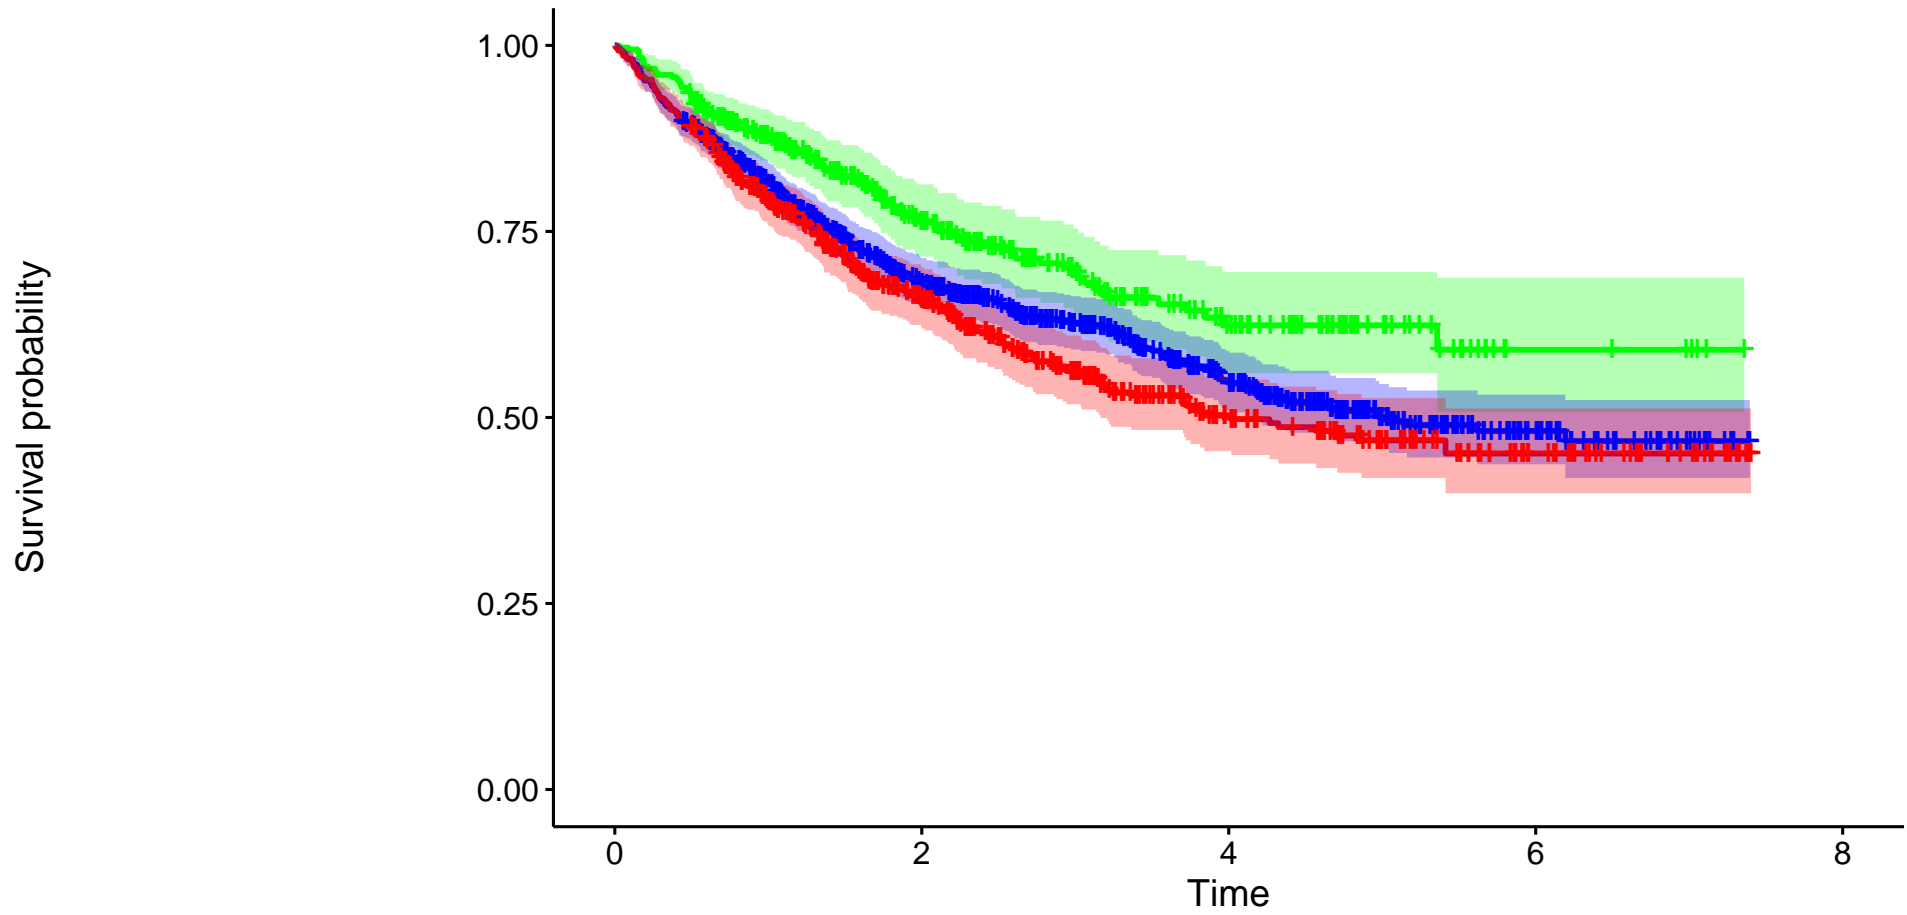

## Number at risk

| Strata                        | 0   | 2   | 4   | 6  | 8 |
|-------------------------------|-----|-----|-----|----|---|
| Cohort=eMTOC                  | 353 | 177 | 61  | 6  | 0 |
| Cohort=Non-MTOC: Metropolitan | 824 | 436 | 211 | 49 | 0 |
| Cohort=Non-MTOC: Regional     | 566 | 275 | 104 | 34 | 0 |
