# Supplementary material for: Survival Impact of an Enhanced Multidisciplinary Thoracic Oncology Conference in a Regional Community Health Care System
Source: PubMed Central journal article supplement — JTO Clin Res Rep. 2021 Jul 3;2(8):100203. doi: 10.1016/j.jtocrr.2021.100203 (PMC8474211; doi:10.1016/j.jtocrr.2021.100203), 2021-07-03
Supplement: mmc3.pdf [file mmc3.pdf]

# Kaplan Meier Survival Curves among Advanced Stage: IV

*Log-Rank p-value: <0.0001*

Strata + Cohort=eMTOC + Cohort=Non-MTOC: Metropolitan + Cohort=Non-MTOC: Regional

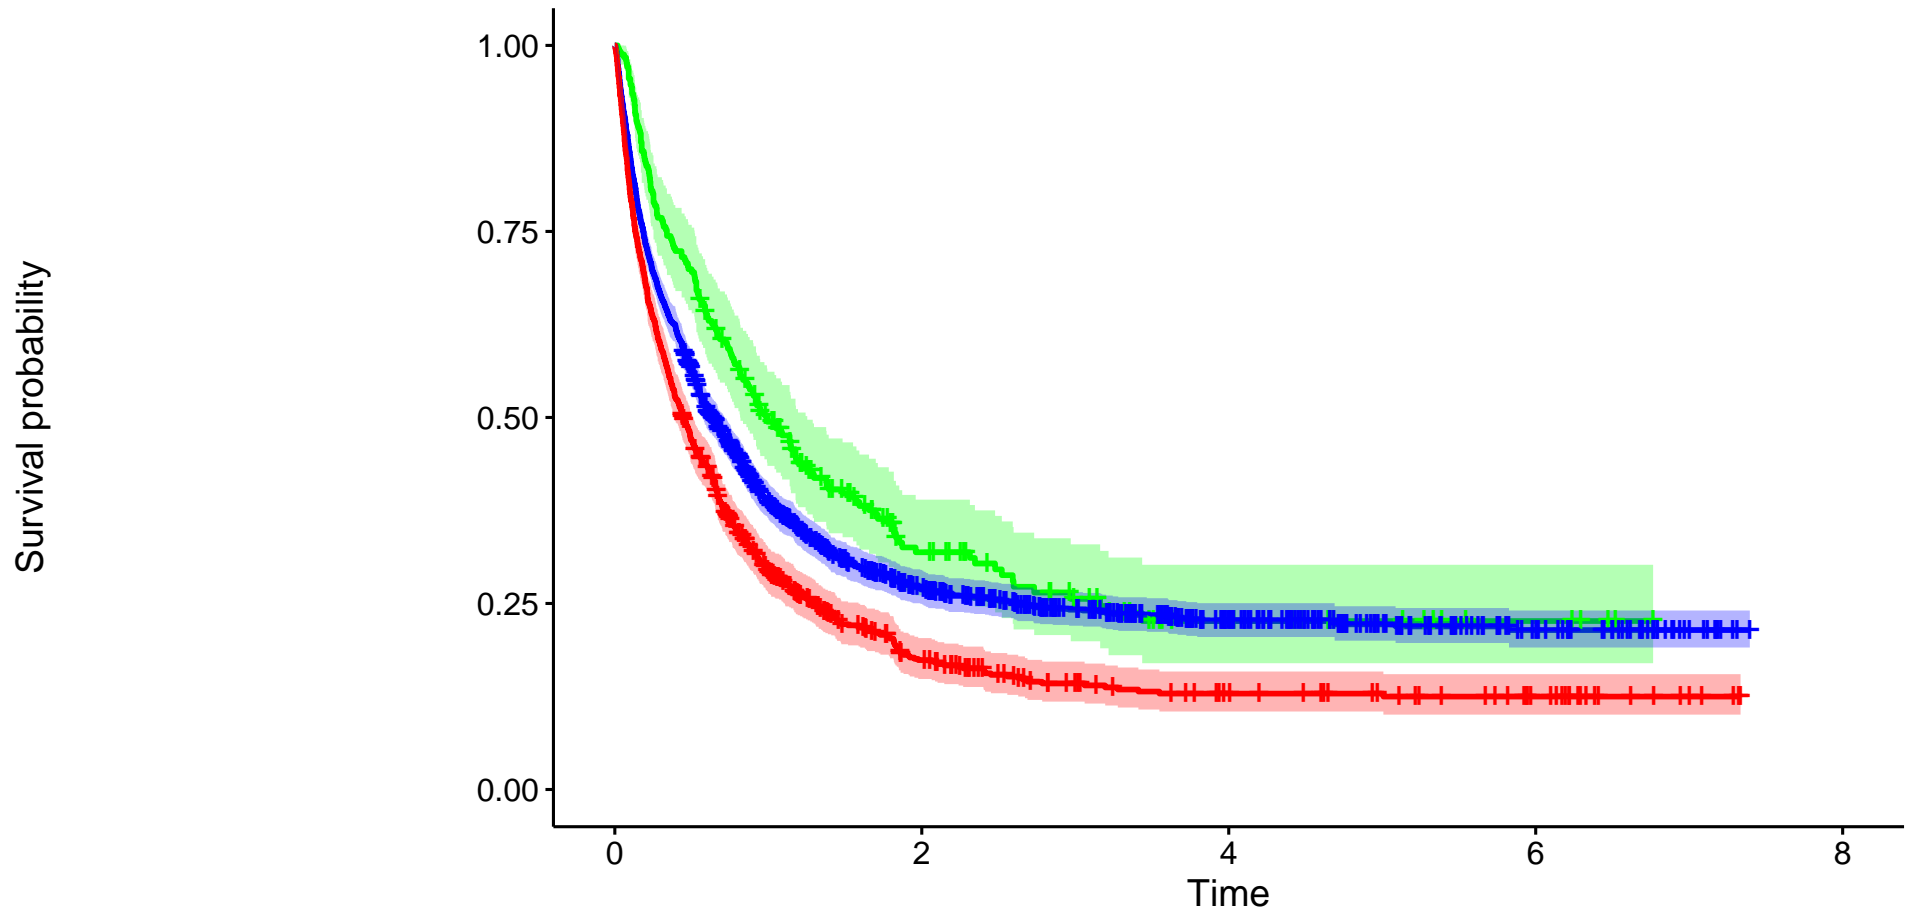

## Number at risk

| Strata                        | 0    | 2   | 4   | 6  | 8 |
|-------------------------------|------|-----|-----|----|---|
| Cohort=eMTOC                  | 246  | 49  | 16  | 5  | 0 |
| Cohort=Non-MTOC: Metropolitan | 1606 | 326 | 143 | 41 | 0 |
| Cohort=Non-MTOC: Regional     | 892  | 100 | 40  | 20 | 0 |

Time
