# Supplementary material for: Survival Impact of an Enhanced Multidisciplinary Thoracic Oncology Conference in a Regional Community Health Care System
Source: PubMed Central journal article supplement — JTO Clin Res Rep. 2021 Jul 3;2(8):100203. doi: 10.1016/j.jtocrr.2021.100203 (PMC8474211; doi:10.1016/j.jtocrr.2021.100203), 2021-07-03
Supplement: mmc4.pdf [file mmc4.pdf]

# Kaplan Meier Survival Curves among Locally-advanced Stage: IIIA(T4/M1)

Log-Rank p-value: 0.2098

Strata Cohort=eMTOC Cohort=Non-MTOC: Metropolitan Cohort=Non-MTOC: Regional

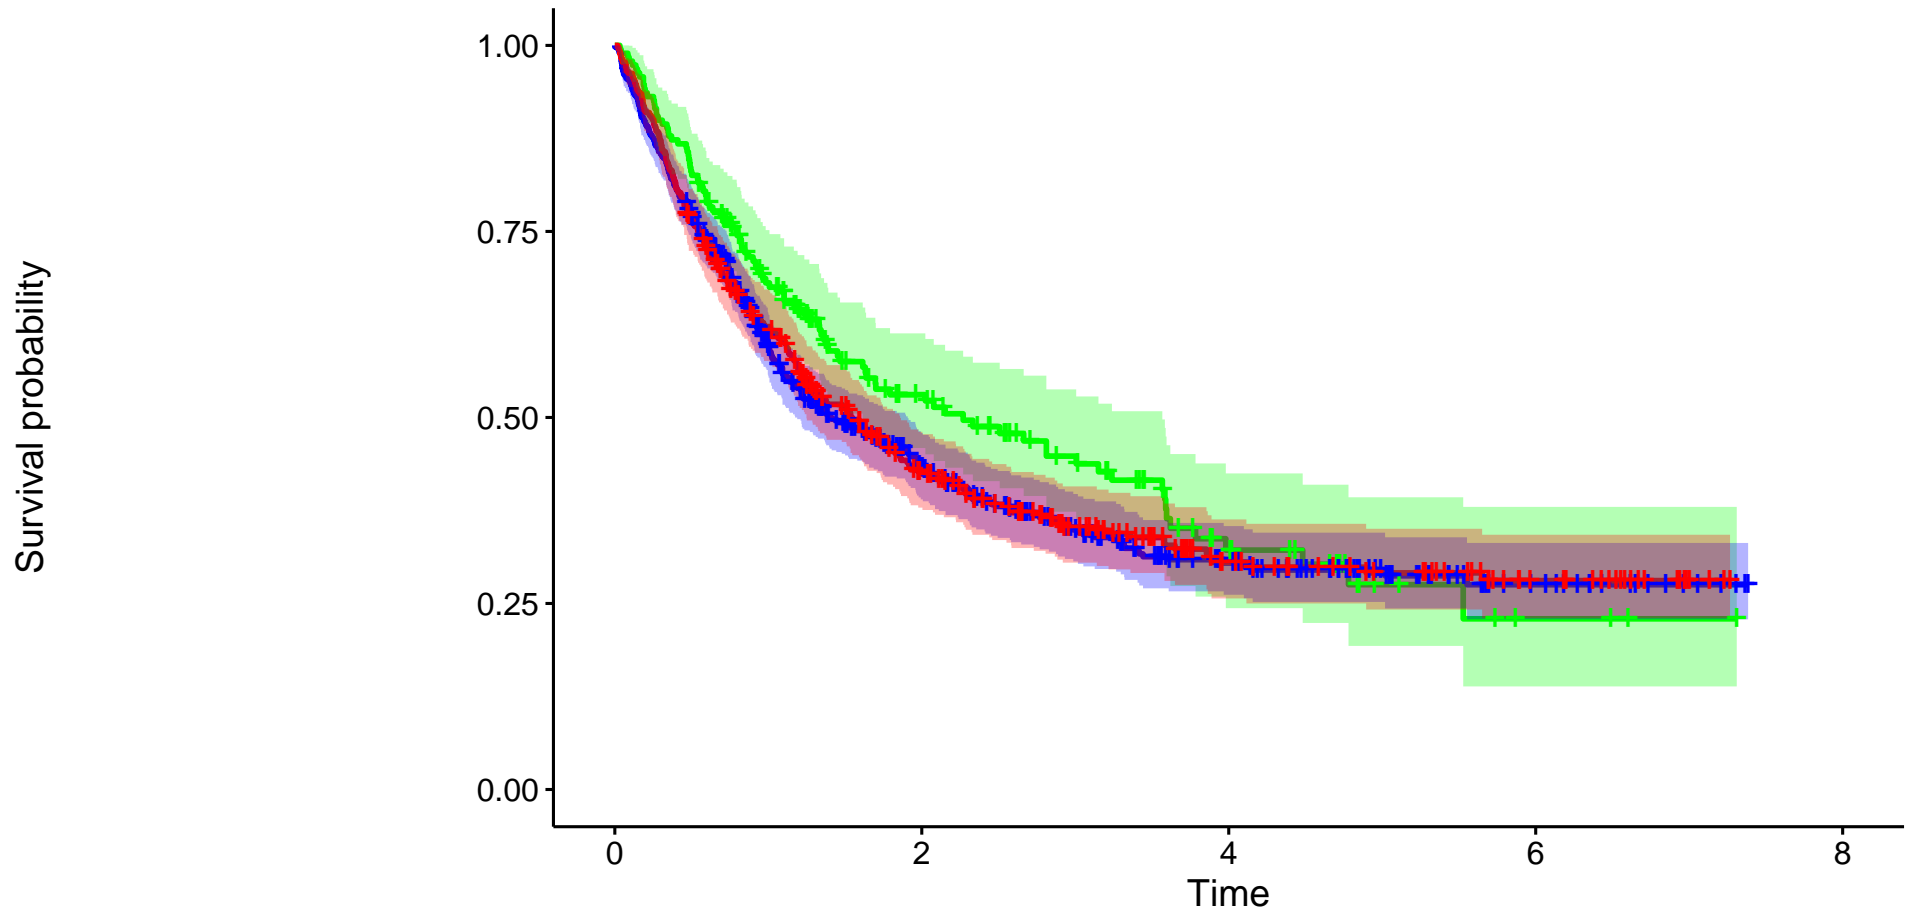

## Number at risk

| Strata                        | 0   | 2   | 4  | 6  | 8 |
|-------------------------------|-----|-----|----|----|---|
| Cohort=eMTOC                  | 189 | 65  | 21 | 3  | 0 |
| Cohort=Non-MTOC: Metropolitan | 540 | 168 | 68 | 17 | 0 |
| Cohort=Non-MTOC: Regional     | 399 | 133 | 49 | 20 | 0 |

Time
